# Supplementary material for: Placing Greater Torque at Shorter or Longer Muscle Lengths? Effects of Cable vs. Barbell Preacher Curl Training on Muscular Strength and Hypertrophy in Young Adults
Source: PubMed Central journal article supplement (PMC7460162; doi:10.3390/ijerph17165859), 2020-08-13

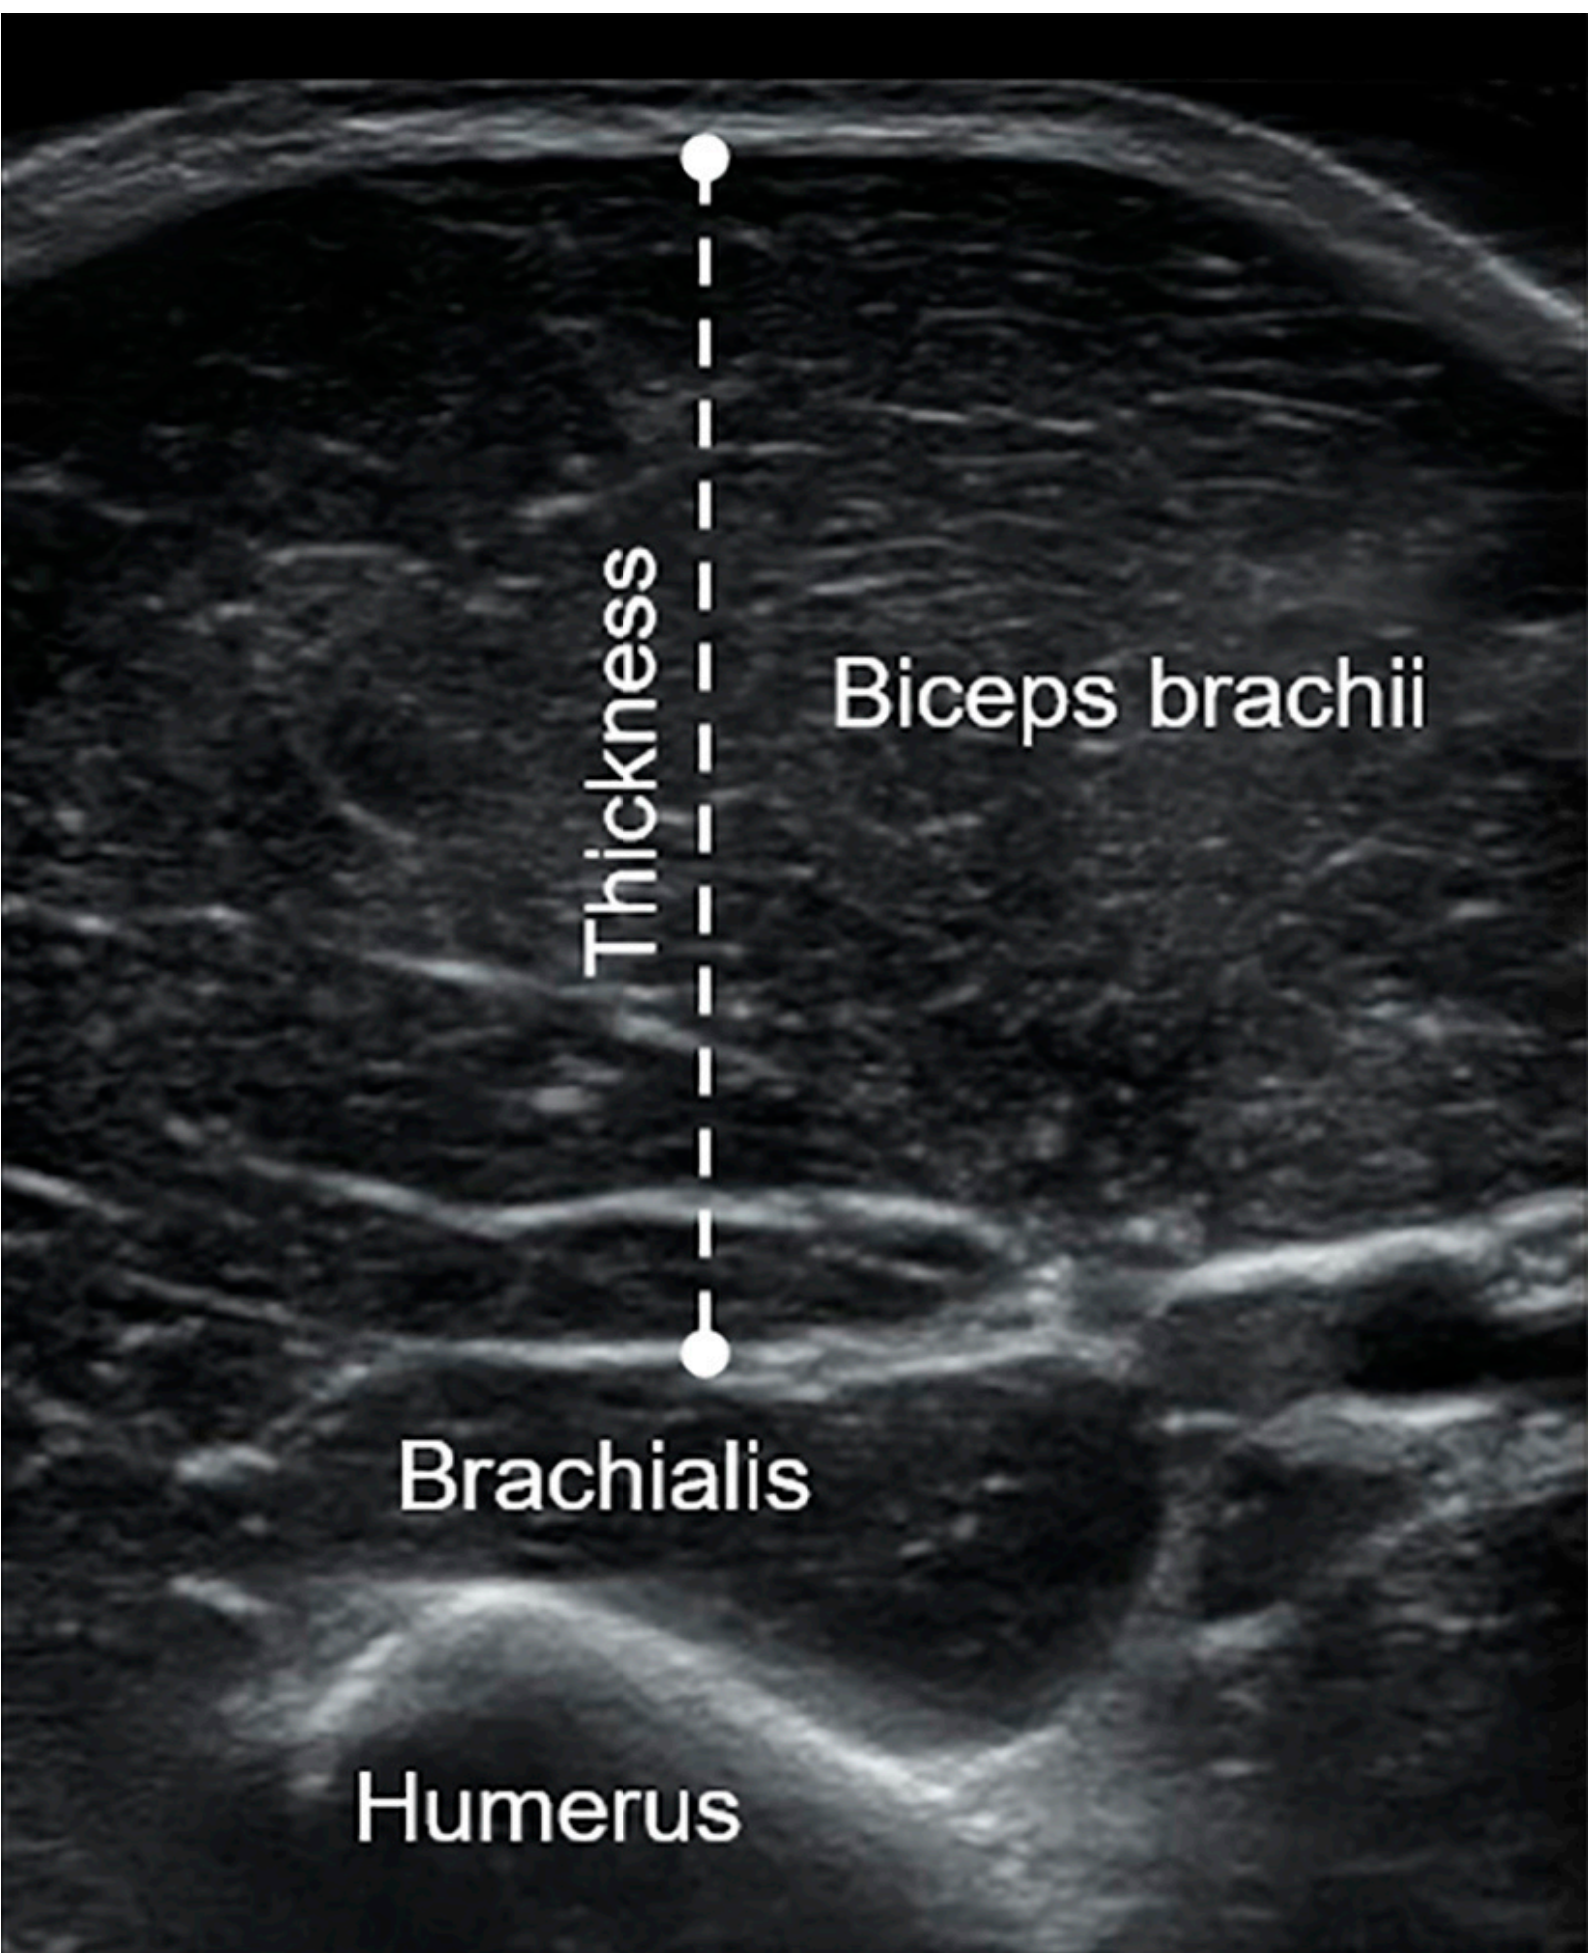

Supplement: ijerph-17-05859-s001.pdf [file ijerph-17-05859-s001.pdf]
